# Supplementary material
Source: MDPI journal article supplement (https://www.mdpi.com/2073-4352/10/4/333)
Supplement: s1 [file s1]

# Effects of Various Inhibitors on the Nucleation of Calcium Oxalate in Synthetic Urine

Yu-Chao Hsu <sup>1</sup>, Yi-Hsuan Lin <sup>2</sup> and Lie-Ding Shiau <sup>1,2,\*</sup>

<sup>1</sup> Department of Urology, Chang Gung Memorial Hospital Linkou, Taoyuan 333, Taiwan

<sup>2</sup> Department of Chemical and Materials Engineering, Chang Gung University, Taoyuan 333, Taiwan

\* Correspondence: shiau@mail.cgu.edu.tw; Tel.: 886-3-2118800; Fax: 886-3-2118700

Received: 30 March 2020; Accepted: 22 April 2020; Published: date

## Supplementary Materials

**Table S1.** The new formula of synthetic urine for in vitro cellular study, adopted by Chutipongtanate and Thongboonkerd [24].

| Composition                                                  | Concentration (mM) |
|--------------------------------------------------------------|--------------------|
| Urea                                                         | 200                |
| Uric acid                                                    | 1.00               |
| Creatinine                                                   | 4.00               |
| Na <sub>3</sub> C <sub>6</sub> H <sub>5</sub> O <sub>7</sub> | 5.00               |
| NaCl                                                         | 54.00              |
| KCl                                                          | 30.00              |
| NH <sub>4</sub> Cl                                           | 15.00              |
| CaCl <sub>2</sub>                                            | 3.00               |
| MgSO <sub>4</sub>                                            | 2.00               |
| NaHCO <sub>3</sub>                                           | 2.00               |
| Na <sub>2</sub> C <sub>2</sub> O <sub>4</sub>                | 0.10               |
| Na <sub>2</sub> SO <sub>4</sub>                              | 9.00               |
| NaH <sub>2</sub> PO <sub>4</sub>                             | 3.60               |
| Na <sub>2</sub> HPO <sub>4</sub>                             | 0.40               |

**Table S2.** The synthetic urine adopted by Robertson and Scurr [21] and Grases et al. [22].

| Composition                                          | Concentration (mM) |
|------------------------------------------------------|--------------------|
| Na <sub>2</sub> SO <sub>4</sub> · 10H <sub>2</sub> O | 9.67               |
| NH <sub>4</sub> Cl                                   | 43.37              |
| KCl                                                  | 81.30              |
| CaCl <sub>2</sub>                                    | 5.00               |
| NaH <sub>2</sub> PO <sub>4</sub> 2H <sub>2</sub> O   | 7.73               |
| Na <sub>2</sub> HPO <sub>4</sub> 12H <sub>2</sub> O  | 7.82               |
| NaCl                                                 | 111.54             |
| Na <sub>2</sub> C <sub>2</sub> O <sub>4</sub>        | 0.56               |

**Table S3.** The measured induction time data for the synthetic urine without inhibitors at 37 °C. Each condition was carried out three times to obtain the average induction time.

| $S(-)$ | $t_i (sec)$ |       |       |         |
|--------|-------------|-------|-------|---------|
|        | Run 1       | Run 2 | Run 3 | Average |
| 10.09  | 992         | 971   | 901   | 955     |
| 11.77  | 421         | 503   | 451   | 458     |
| 13.65  | 225         | 201   | 228   | 218     |
| 18.01  | 137         | 122   | 122   | 127     |

**Table S4.** The measured induction time data for the synthetic urine in the presence of magnesium for  $S = 13.65$  at 37 °C. Each condition was carried out three times to obtain the average induction time.

| $C_i (ppm)$ | $t_i (sec)$ |       |       |         |
|-------------|-------------|-------|-------|---------|
|             | Run 1       | Run 2 | Run 3 | Average |
| 0           | 225         | 201   | 228   | 218     |
| 200         | 309         | 409   | 448   | 389     |
| 400         | 529         | 663   | 699   | 630     |
| 600         | 877         | 847   | 819   | 848     |
| 800         | 1399        | 1272  | 1311  | 1327    |
| 1000        | 2028        | 1990  | 2151  | 2056    |

**Table S5.** The measured induction time data for the synthetic urine in the presence of citrate for  $S = 13.65$  at 37 °C. Each condition was carried out three times to obtain the average induction time.

| $C_i (ppm)$ | $t_i (sec)$ |       |       |         |
|-------------|-------------|-------|-------|---------|
|             | Run 1       | Run 2 | Run 3 | Average |
| 0           | 225         | 201   | 228   | 218     |
| 200         | 464         | 461   | 499   | 475     |
| 400         | 806         | 676   | 697   | 726     |
| 600         | 1422        | 1687  | 1284  | 1464    |
| 800         | 2621        | 3087  | 2820  | 2843    |

**Table S6.** The measured induction time data for the synthetic urine in the presence of hydroxycitrate for  $S = 13.65$  at  $37^\circ\text{C}$ . Each condition was carried out three times to obtain the average induction time.

| $C_i$ (ppm) | $t_i$ (sec) |       |       |         |
|-------------|-------------|-------|-------|---------|
|             | Run 1       | Run 2 | Run 3 | Average |
| 0           | 225         | 201   | 228   | 218     |
| 100         | 506         | 478   | 495   | 493     |
| 200         | 661         | 610   | 521   | 597     |
| 300         | 930         | 807   | 841   | 859     |
| 400         | 1053        | 1211  | 1008  | 1091    |
| 500         | 3594        | 3781  | 3740  | 3705    |
| 600         | 4386        | 4596  | 4670  | 4551    |

**Table S7.** The measured induction time data for the synthetic urine in the presence of chondroitin sulfate for  $S = 13.65$  at  $37^\circ\text{C}$ . Each condition was carried out three times to obtain the average induction time.

| $C_i$ (ppm) | $t_i$ (sec) |       |       |         |
|-------------|-------------|-------|-------|---------|
|             | Run 1       | Run 2 | Run 3 | Average |
| 0           | 225         | 201   | 228   | 218     |
| 10          | 591         | 667   | 540   | 599     |
| 15          | 829         | 789   | 793   | 804     |
| 20          | 968         | 942   | 914   | 941     |
| 40          | 1156        | 1006  | 1172  | 1111    |
| 60          | 1149        | 980   | 1034  | 1054    |

**Table S8.** The measured induction time data for the synthetic urine in the presence of phytate for  $S = 13.65$  at  $37^\circ\text{C}$ . Each condition was carried out three times to obtain the average induction time.

| $C_i$ (ppm) | $t_i$ (sec) |       |       |         |
|-------------|-------------|-------|-------|---------|
|             | Run 1       | Run 2 | Run 3 | Average |
| 0           | 225         | 201   | 228   | 218     |
| 0.5         | 1078        | 1040  | 888   | 1002    |
| 1.0         | 1722        | 1487  | 1683  | 1631    |
| 1.5         | 2492        | 2311  | 2193  | 2332    |
